# Supplementary material for: Label-free stimulated Raman scattering microscopy visualizes changes in intracellular morphology during human epidermal keratinocyte differentiation
Source: PubMed Central journal article supplement (PMC6715667; doi:10.1038/s41598-019-49035-x), 2019-08-29
Supplement: 41598_2019_49035_MOESM1_ESM.pdf [file 41598_2019_49035_MOESM1_ESM.pdf]

Supplementary Information

## Label-free stimulated Raman scattering microscopy visualizes changes in intracellular morphology during human epidermal keratinocyte differentiation

Mariko Egawa<sup>1,\*</sup>, Shinya Iwanaga<sup>1</sup>, Junichi Hosoi<sup>1</sup>, Makiko Goto<sup>1</sup>, Haruyo Yamanishi<sup>1</sup>, Masashi Miyai<sup>1</sup>, Chika Katagiri<sup>1</sup>, Kyoya Tokunaga<sup>2</sup>, Takuya Asai<sup>2</sup>, and Yasuyuki Ozeki<sup>2</sup>

<sup>1</sup> Shiseido Global Innovation Center, Yokohama 220-0011, Japan

<sup>2</sup> Department of Electrical Engineering and Information Systems, Graduate School of Engineering, The University of Tokyo, Tokyo 113-8656, Japan

Supplementary Figure S1, Supplementary Video S1, and Supplementary Video S2.

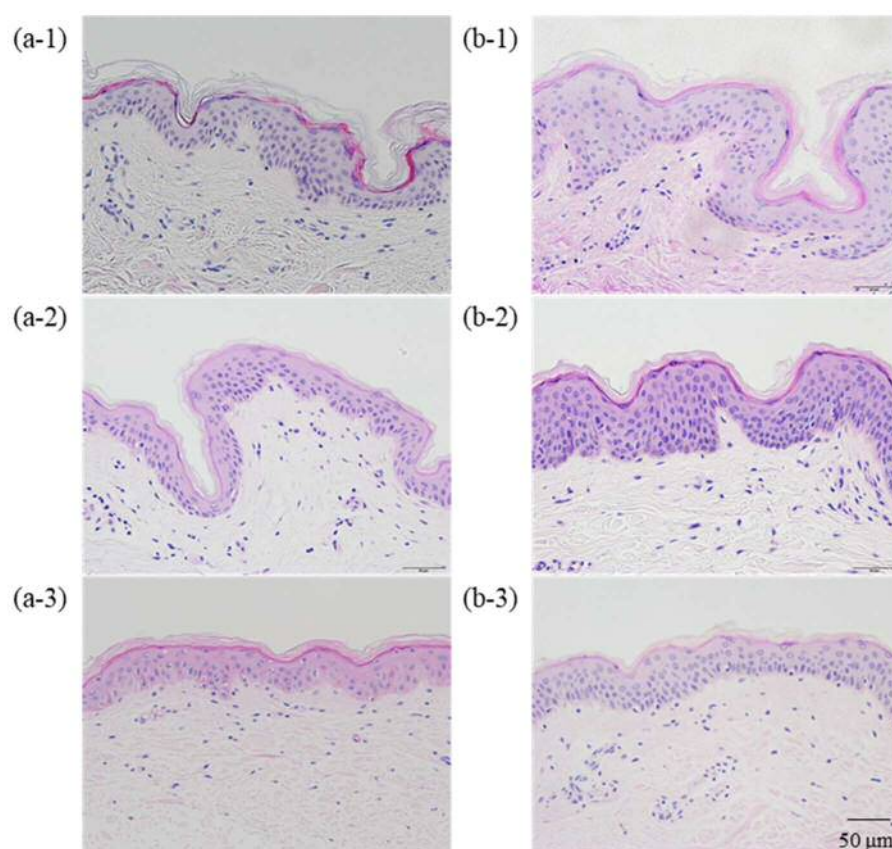

**Supplementary Figure S1.** Vertical cross-section images of haematoxylin-eosin staining correspond to the optical cross-section images at  $2930\text{ cm}^{-1}$  shown in Fig. 5. (a1–3) shows staining images of abdominal skin of 33-, 70-, and 74-year-old subjects and (b1–3) shows those of 39-, 49-, and 56-year-old subjects, respectively. Parakeratosis (state where the nucleus remains in the dead cells of the stratum corneum) was not observed in any skin.

**Supplementary Video S1.** Three-dimensional intracellular morphologies of abdominal skin of a 56-year-old subject. The stratum corneum, stratum granulosum, stratum spinosum, and stratum basal (from outermost to innermost). The size of each optical horizontal cross-section image is 80  $\mu\text{m}$  in the vertical and horizontal directions at a 1- $\mu\text{m}$  interval in depth.

**Supplementary Video S2.** Three-dimensional intracellular morphologies of eyelid skin of a 59-year-old subject. The stratum corneum, stratum granulosum, stratum spinosum, and stratum basal (from outermost to innermost). The size of each optical horizontal cross-section image is 80  $\mu\text{m}$  in the vertical and horizontal directions at a 1- $\mu\text{m}$  interval in depth.
